# Supplementary material for: Arabidopsis AtNAP regulates fruit senescence
Source: PubMed Central journal article supplement — J Exp Bot. 2012 Oct 15;63(17):6139–47. doi: 10.1093/jxb/ers266 (PMC3481206; doi:10.1093/jxb/ers266), 2012-10-15
Supplement: supp_ers266_jexbot080143_file001.pdf [file supp_ers266_jexbot080143_file001.pdf]

## Arabidopsis AtNAP regulates fruit senescence

Xiaohong Kou, Chris B. Watkins, Su-Sheng Gan

**Supplemental Table S1. Primers used for qPCR**

| Primer number | Sequence (5' → 3')          | Gene           |
|---------------|-----------------------------|----------------|
| G3500         | ATG TGT CTC CTG GCT CTT     | <i>ACS2</i>    |
| G3501         | GCA CTC TTG TTC TGG ATT AC  | <i>ACS2</i>    |
| G3502         | GATGCTTCCTTCAGATAGTG        | <i>ETR1</i>    |
| G3503         | CTACAGCCACCTATAATAAGAG      | <i>ETR1</i>    |
| G3504         | CTG AGT ATG GCT TAT GAT GTG | <i>CTR1</i>    |
| G3505         | GGA GGA TTG CGA TTG TGA     | <i>CTR1</i>    |
| G3506         | GCTTCCTTGCTCGGTAAT          | <i>EIN2</i>    |
| G3507         | CATCACGGTATTCCATCTCA        | <i>EIN2</i>    |
| G3508         | CTGTGACTGGTGCTTCTG          | <i>EIN3</i>    |
| G3509         | TTCTCCGCTTGATACTTGG         | <i>EIN3</i>    |
| G3510         | GAGCCGTCTTCTTCGTCTTCC       | <i>ERF1</i>    |
| G3511         | GTCTCTAATCTCCGCCGCAAAT      | <i>ERF1</i>    |
| G3512         | AGCCATTCACAGCGGTTCA         | <i>AtNAP</i>   |
| G3513         | GCTTACTTGCTCCTCTCTTCTTG     | <i>AtNAP</i>   |
| G3514         | ACCTTGCTGGACGTGACCTTACTGAT  | <i>Actin 2</i> |
| G3515         | GTTGTCTCGTGGATTCCAGCAGCTT   | <i>Actin 2</i> |
